# Supplementary material
Source: publisher figshare collection journal article supplement (https://frontiersin.figshare.com/ndownloader/files/13214609)

Figure S1

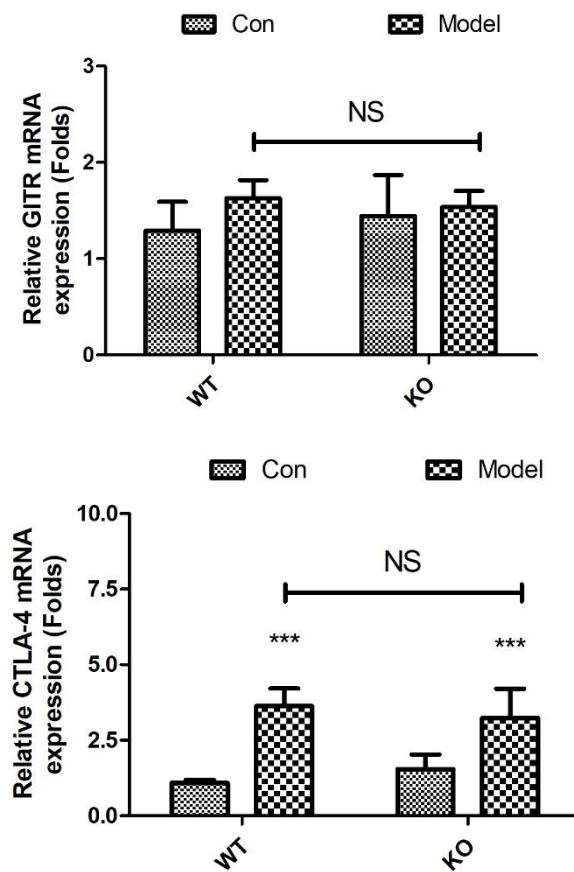

Supplement: Supplementary file [file 13214609]
